# Supplementary material for: Comprehensive analysis of tertiary lymphoid structures-related genes for prognostic prediction, molecular subtypes and immune infiltration in gastric cancer
Source: publisher site journal article supplement (doi:10.18632/aging.205247), 2023-11-27
Supplement: Supplementary file [file aging-v15i22-205247-supplementary-material-SD1.pdf]

## SUPPLEMENTARY TABLE

Supplementary Table 1. The 39 TLS-RGs obtained from the TCGA dataset.

---

CCL18  
CCL19  
CCL2  
CCL20  
CCL21  
CCL3  
CCL4  
CCL5  
CCL8  
CCR5  
CD200  
CD38  
CD4  
CD40  
CD5  
CSF2  
CXCL11  
CXCL13  
CXCL8  
CXCL9  
CXCR3  
FBLN7  
GFI1  
ICOS  
IGSF6  
IL10  
IL1R1  
IL1R2  
IL2RA  
IRF4  
MS4A1  
PDCD1  
SDC1  
SGPP2  
SH2D1A  
STAT5A  
TIGIT  
TNFRSF17  
TRAF6

---
