# Supplementary material for: Comprehensive analysis of tertiary lymphoid structures-related genes for prognostic prediction, molecular subtypes and immune infiltration in gastric cancer
Source: Aging (Albany NY). 2023 Nov 27;15(22):13368–83. doi: 10.18632/aging.205247 (PMC10713392; doi:10.18632/aging.205247)
Supplement: Supplementary Table 2 [file aging-15-205247-s002.xlsx]

## Sheet: Supplementary Table 2
Supplementary Table 2. The co-differential expressed genes between TLS clusters.
CCL19
ARHGAP15
CD79B
CD48
CCR7
GIMAP7
CD37
FCRLA
CD52
PPP1R16B
ABI3BP
ARHGEF6
TRAF3IP3
GIMAP5
SLC9A9
CD79A
RASGRP2
PTGDS
GYPC
P2RY8
NAPSB
VPREB3
CD1D
GIMAP6
TBC1D10C
CD1C
CLECL1
IL16
CD3D
FCRL3
CD2
TNFRSF13B
FAM107A
EVL
RASSF2
CCL21
BLK
BTK
LY86
CD19
CYSLTR1
TLR10
LYL1
BCL2
GIMAP8
MEF2C
MMRN1
CR2
RFTN1
ITM2A
ITPR1
LY9
FCRL2
SELL
PNOC
CD96
ZEB2
CXCR5
CYP1B1
BTLA
GPR18
HVCN1
RAMP3
ADRB2
FNBP1
TLR7
MEOX1
CXCR4
PLEKHO1
CXCL12
GIMAP1
CD8A
CD28
ST8SIA1
ATP8B4
RSPO3
CYYR1
SELP
IL7R
RBP5
TSC22D3
CCL5
BANK1
TEK
CFH
MS4A1
LRMP
C1S
EFEMP1
CD22
IKZF1
GNG2
SNRPN
KLRG1
PECAM1
SH2D3C
POU2AF1
CLEC10A
FCER2
PLCG2
NCR3
CD1E
IL2RB
COLEC12
PDE4B
ADAMTS1
CILP
ETS1
FCGR2B
HLA-DQA1
SERPING1
HLA-DOA
GAS7
HEG1
ESR1
CYFIP2
SERPINF1
MAN1C1
FLI1
DPEP2
MFNG
RCSD1
SAMSN1
ARHGAP20
TCL1A
P2RY14
LTB
FLT3
ATP8B2
AKNA
PRKCH
TMEM119
TCF4
CLIC2
TNFSF12
ECM2
SYT11
DCN
DPT
A2M
APOL3
MFAP5
CLEC1A
FOLR2
TMEM47
CD40LG
ZNF25
C1R
RGL1
BASP1
OLFML1
NKG7
LRRK2
CX3CR1
VIM
ENTPD1
HLA-DMB
GGT5
ZNF671
ELMO1
PAPLN
CYBB
ANKRD55
HLA-DPA1
SH3BGRL
PIK3IP1
TNFSF13B
SNURF
FMNL3
ENPP2
HDC
SIGLEC10
ARRDC5
APOBEC3G
RCBTB2
SPOCK2
CFD
F13A1
CR1
MOXD1
TMEM71
CRISPLD2
NEXN
CTSO
MDFIC
DOCK11
IGFBP5
KCNMA1
LAYN
HLA-DRA
KCNJ8
JAZF1
AP1S2
LGI2
ICOS
CPA3
PPM1M
TIMD4
GPR68
IL18BP
DHCR7
PLA2G4C
ATM
GPR34
SNRK
RTN1
NR3C1
GREM1
STAB1
CD74
ITGB7
P2RY12
ALDH1A3
LRRC32
ASPA
PLEK
FLT3LG
EPB41L3
CHI3L2
GYPE
TGFB3
CD84
TXNIP
SNX29
PALLD
ISCU
GZMA
GJA4
OLFML3
POU2F2
TMEM156
ASB2
TPSAB1
GRAP
AMPD1
CXCR6
SLAMF7
P2RY13
PLXDC2
TIMP3
CD86
PDCD1
FBLN2
VWF
LST1
BMP6
PMP22
TSPAN4
FMO2
NMUR1
GZMH
GNGT2
SLA2
CD93
EGR2
CD38
VGLL3
ABCB1
GLIPR1
FYN
VEGFC
MAF
CCDC69
IL3RA
EMP3
TGFBR2
RASGRP1
PLCL2
ABCA1
CNN3
PTGFR
DSE
COL8A2
MAP3K3
DNASE1L3
SQLE
NCKAP1L
CALCRL
GBP2
FBN1
CD226
CXCR3
STOM
MBNL1
AXL
SH3BP5
CFP
C1QA
CMKLR1
YPEL5
CDH11
IL1R1
IL21R
RARRES2
BTG2
MYCT1
KLHL5
LTF
PTPN22
CTSK
ADAM19
IL12RB1
STX11
PRRX1
CD180
NIN
MATN2
SPIB
CLIC4
GNB4
PPP3CB
CNR2
PJA2
MSC
TP53INP1
SWAP70
DAB2
ZNF626
PRCP
HIC1
EIF4E3
APOBEC3H
PEA15
TXNDC15
TNFRSF13C
MYO1F
CMTM8
PLCL1
YPEL4
FMO1
PHF21A
PDGFRB
LUM
FRMD4A
FRMD6
CENPE
COL15A1
MRAS
ZNF366
MCTP1
C3AR1
SMARCA2
C1RL
DARS2
CITED2
THBS1
PTTG1
CCNA2
HAVCR2
CBLN3
MAP7
QKI
TBC1D9
C1QC
RGS2
RAB31
PVALB
ZIK1
E2F7
SIPA1
PSMD3
BTG1
CLEC4A
MMRN2
YWHAZ
TRIB3
C1QB
ITPA
DAZL
LBH
CENPM
SLC15A3
CD207
FBXL6
TBC1D2B
HLA-DQB1
CKS2
LCP2
IL6ST
TLCD1
MTHFD2
RORA
TMEM140
OPRL1
STARD8
DOK2
ANKRD29
ZNF695
HOXA4
THY1
ICAM2
RAD51AP1
GRTP1
CCR5
ECT2
DUSP1
CD163
POMC
NLRP1
PPP1R14A
GFI1
TRAF4
TK1
CD200
KIF11
AKT3
ALPK2
RAB37
CRBN
HLA-DMA
CTSW
DDR1
FEN1
COL6A3
MCM2
MND1
GRB7
CCL23
GADD45B
PRF1
GNAI2
VAMP1
CLCN2
CHAF1B
NRP1
ARID5B
SLAMF8
LMNB2
RAPGEF1
OVOL1
TMEM141
CDCP1
CCL11
AIM2
S100B
TCTEX1D1
HERC1
POLR3GL
POLQ
FMO3
EZH2
SOBP
FEZ2
GBP4
MNDA
MVD
NCAPG2
PLD4
IL15
ST6GALNAC5
CCND2
MTX1
PKHD1L1
GNG8
BCL6
CCPG1
NNMT
CDC42BPG
PCDHB4
CMTM3
CLEC12A
P2RX1
HMGCS1
PDCD1LG2
IGSF6
ZFP90
DYSF
PTGER4
MAD2L1
APOBEC3F
MVK
TIPIN
FGR
DTL
ADAMDEC1
RNF130
TIAM1
UHRF1
BTN3A3
ZNF132
PIK3R1
HSF5
DTNA
CREB3L2
C6orf136
GBP5
SMAD9
RAP1A
TSPAN33
RRM2
DENND2A
LILRB2
TMEM53
RRAGA
FPR3
SLC2A5
SAMD9L
NAPSA
RAB3IP
GINS3
ERG
ROBO1
RFC4
HCK
F11R
ANKRD44
CCNE1
PSAT1
CPXM1
CIITA
PPAT
SLC26A6
PPP1R16A
PAK6
IL2RA
CD300LB
CXCL9
MIAT
FAS
ANKRD12
CRTAM
IFIT2
TLR8
HELLS
REEP1
CD7
RPS23
POP5
CCL20
CD40
LXN
KCNK12
ACY1
CLK4
MDGA1
ITGAX
KIF17
IL18RAP
LAG3
PRDM1
GP1BA
STK35
DEPDC1B
FCGR2A
CLEC7A
SYTL3
PER1
POLR2J
TWSG1
STX3
GTSCR1
C4A
SCRIB
TNFAIP3
LILRB4
FLAD1
MTHFD1
ZBTB32
TIFAB
BCL6B
SLC25A22
MAST4
GART
TNFRSF4
VCAN
DIP2C
ZNF382
RFC5
PSMB2
RNF122
SIRPG
RBM43
INPP5B
TYMS
ENOX1
HLA-E
PCNA
IL18R1
PDPN
LMNB1
NLRC4
TERF2IP
CD2AP
ZYX
SLC1A3
SLC25A1
RFC2
TNFRSF9
MTSS1
VSIG4
RANBP1
HHEX
FASLG
WDHD1
LIMCH1
PROS1
POMP
PILRA
AK2
TTLL7
NUP37
CHAF1A
HLA-DRB6
TMPO
LIG1
CENPH
FCER1G
CTLA4
CCR1
GK
RPRM
RMI1
CENPK
PTAFR
MMP12
LARP6
LRRC25
ALAS1
RGS11
IRF8
MREG
RBBP8
FBXO5
LIPA
GBP1
DNAJC5B
TNFRSF1B
CACYBP
TBX21
ARMCX4
MPHOSPH6
KCNH2
ESCO2
LAMP3
PBX1
CD300LF
CXCL1
RPA3
HOXA5
GM2A
PATL1
BTN3A1
GPR141
BTN3A2
TMEM33
PGK1
EIF5A
POLA2
INPP5A
TRIM69
DNAJC9
FERMT1
CD244
IFI44L
GCHFR
POLD1
CX3CL1
PSMA4
PALB2
MRPL50
SLBP
BAK1
CD8B
ZNF683
CERK
MOCS1
NUP50
CCT8
SIGLEC1
RASSF4
SEMA6C
PI4K2B
CNNM4
PLCH1
BTN2A2
IL2RG
KNTC1
HLA-DRB1
HNRNPF
JAKMIP1
MYEOV
RAB6B
DYNC1I1
SAMHD1
CDC7
HOXA2
RIPK2
RRM1
DCUN1D5
BUB3
DDX58
LDHA
ZHX3
CDC42SE2
PDE9A
NDUFA9
SARM1
SLC25A28
LAP3
B2M
NRAS
C19orf54
LILRA5
MCM6
MCCC2
SIGLEC9
XAF1
CASP1
C1QBP
DNAJA1
NFKB1
KLRC1
NANS
SLC25A4
NUP205
SGPL1
RBCK1
STT3A
LRRC49
TAF5
GJB2
ENAH
BAZ1A
SERTAD4
SERP2
C1orf21
TNFSF10
SEMA6A
XRN1
BIRC3
AAMP
AGT
FCGR1A
PMAIP1
GPR25
TGM2
CCL4L2
CKB
GTF2H3
TLR2
DHX15
CTSS
CSF3R
NINJ1
POLB
PTCRA
MRPL22
ALG6
NFE2L3
PLA2G7
PRPF40A
KLRD1
FGF13
FCGR1B
PSMA5
RERE
CCL4
CHST10
SERPINB9
TNFSF4
RNF149
MPDU1
DHFR
LGMN
PDE12
CXCL10
AMD1
HSPA4
PRIM1
IFI44
HNRNPL
PIK3CB
C9orf116
CYP39A1
COQ2
SLC25A17
SEMA4A
EHF
DTX2
OLR1
TRMT11
RBPJ
UBA6
AGPAT5
LRRC61
ITGB3BP
ADAMTSL2
HLA-DRB5
SAAL1
FANCL
IFIT5
MRPL44
MORC4
RAB20
NXT2
TNIP3
MMP25
PSMA1
CISD2
NCK1
IKBKE
GLA
SV2A
PPA1
CD300C
UBE2L6
SLC25A40
CD300A
FBXO17
OAS1
ARL6IP6
HAPLN3
HMGB2
RET
NPL
PIK3AP1
PRELID1
CD160
ACOT7
DNASE2
TNFRSF10B
APOC1
LIN54
MRPL32
SCMH1
ZBP1
PSMC4
ADAM10
CASP5
ATP2C1
TNFRSF10A
RAMP1
VPS33A
WDR76
BMP2K
C21orf91
IGSF11
TRAFD1
SUCNR1
RAN
NCF2
HNRNPA1
TMEM25
SOCS1
PHF5A
ZNF34
PLAUR
RIF1
TMSB10
SGPP2
DLAT
TTC9C
SHC2
LONRF2
MCM5
ZBED2
PTGES3
TNFRSF18
IFIH1
JAK2
PSMA3
NPTXR
CHCHD3
CLPP
DBN1
DCLRE1B
CD80
TRNT1
SSBP1
LYSMD2
NECAP2
SRP54
KCNIP3
TLR3
SERPINB1
MINPP1
CTSC
CHAC2
BCL2A1
AKAP5
C1GALT1C1
CD47
TTC14
EIF4A1
ST3GAL4
PSMC6
CDC42EP1
KIR3DL2
IFIT3
NCR1
RFX5
CDK7
PTPN2
RARA
ITGAE
PRKAB2
ZNF827
BATF2
CAPN13
SNTA1
UTP15
IL4I1
OAS3
PCDHB5
TIMP4
CMTM6
PRPS2
MUC20
GLS2
CXorf38
GNPTAB
MXD1
ACP5
HLA-B
G3BP1
SNCAIP
DPY19L1
PRKCQ
MRPL16
FCGR3A
CASP3
KCNH8
KLHDC7B
OAS2
SAMD9
CCNC
MOV10
CLEC4E
PIGF
ASCC3
ECHDC2
EIF4E
PARP12
CBFB
NOD2
RHOBTB3
GLOD4
CCL8
PKP4
CD68
RFXANK
NUP153
HERC6
